# Supplementary material
Source: Springer Nature journal article supplement (https://www.springermedizin.de/resource/supplementary/12943_2010_884_MOESM12_ESM.pdf/9551950)

**A**

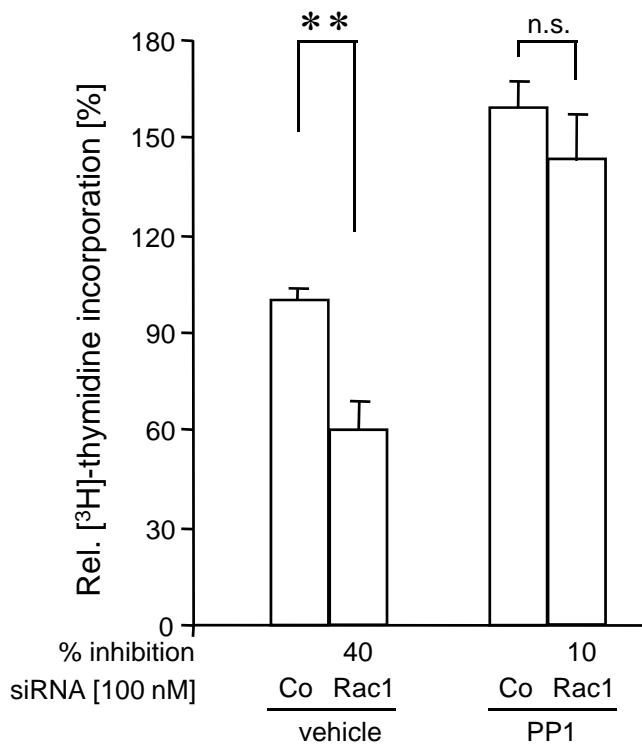

**B**

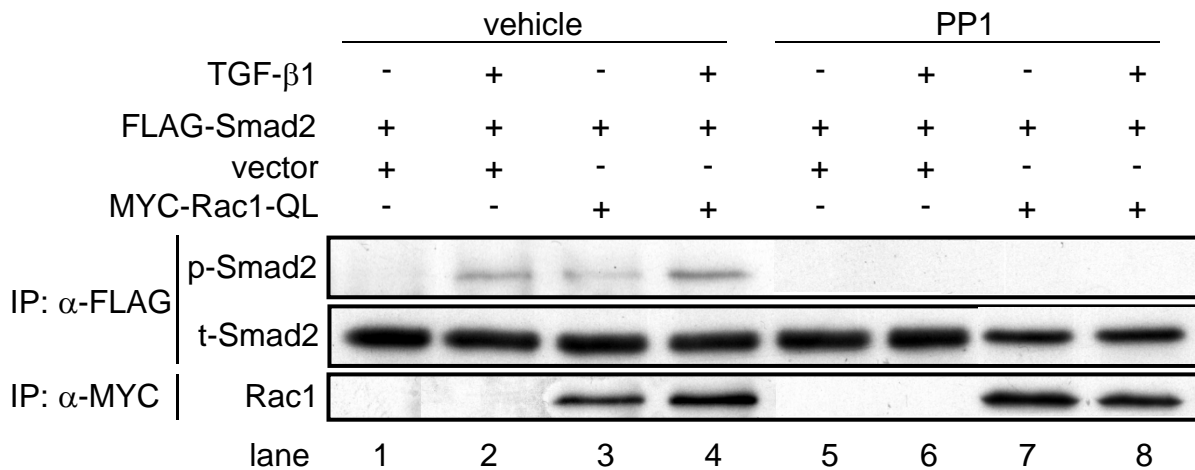

Supplement: MOESM12 [file 9551950]
